# Supplementary material for: Distributions and sources of traditional and emerging per- and polyfluoroalkyl substances among multiple environmental media in the Qiantang River watershed, China
Source: Royal Society of Chemistry journal article supplement (doi:10.1039/d2ra02385g), 2022-01-01
Supplement: d2ra02385g1.pdf [file d2ra02385g1.pdf]

## Supporting Information

Distributions and sources of traditional and emerging per-  
and polyfluoroalkyl substances among multiple environmental  
media in the Qiantang River watershed, China

Zhengzheng Liu, <sup>a</sup> Jingqing Zhou, <sup>b</sup> Yalu Xu, <sup>b</sup> Jiafeng Lu, <sup>b</sup> Jinyuan Chen, <sup>\*a</sup>  
and Jing Wang <sup>\*b</sup>

<sup>a</sup> College of Environment, Zhejiang University of Technology, Hangzhou, China.

E-mail: [cjy1128@zjut.edu.cn](mailto:cjy1128@zjut.edu.cn)

<sup>b</sup> Zhejiang Ecological and Environmental Monitoring Center, Zhejiang  
Ecological and Environmental Monitoring Center, Zhejiang Key Laboratory of  
Ecological and Environmental Monitoring, Forewarning and Quality Control,  
Hangzhou, China

**TableS1 The abbreviations and structures of PFASs**

| Compound name                                   | Abbreviation | Structures                                                                                            | Category |
|-------------------------------------------------|--------------|-------------------------------------------------------------------------------------------------------|----------|
| Perfluorobutanoic acid                          | PFBA         | $\text{CF}_3(\text{CF}_2)_2\text{COOH}$                                                               | T        |
| Perfluoropentanoic acid                         | PFPeA        | $\text{CF}_3(\text{CF}_2)_3\text{COOH}$                                                               | T        |
| Perfluorohexanoic acid                          | PFHxA        | $\text{CF}_3(\text{CF}_2)_4\text{COOH}$                                                               | T        |
| Perfluoroheptanoic acid                         | PFHpA        | $\text{CF}_3(\text{CF}_2)_5\text{COOH}$                                                               | T        |
| Perfluorooctanoic acid                          | PFOA         | $\text{CF}_3(\text{CF}_2)_6\text{COOH}$                                                               | T        |
| Perfluorononanoic acid                          | PFNA         | $\text{CF}_3(\text{CF}_2)_7\text{COOH}$                                                               | T        |
| Perfluorodecanoic acid                          | PFDA         | $\text{CF}_3(\text{CF}_2)_8\text{COOH}$                                                               | T        |
| Perfluoroundecanoic acid                        | PFUnA        | $\text{CF}_3(\text{CF}_2)_9\text{COOH}$                                                               | T        |
| Perfluorododecanoic acid                        | PFDoA        | $\text{CF}_3(\text{CF}_2)_{10}\text{COOH}$                                                            | T        |
| Perfluorotridecanoic acid                       | PFTTrA       | $\text{CF}_3(\text{CF}_2)_{11}\text{COOH}$                                                            | T        |
| Perfluorotetradecanoic acid                     | PFTeA        | $\text{CF}_3(\text{CF}_2)_{12}\text{COOH}$                                                            | T        |
| Perfluorobutane sulfonate                       | PFBS         | $\text{CF}_3(\text{CF}_2)_3\text{SO}_3\text{H}$                                                       | T        |
| Perfluorohexane sulfonate                       | PFHxS        | $\text{CF}_3(\text{CF}_2)_5\text{SO}_3\text{H}$                                                       | T        |
| Perfluoroheptane sulfonate                      | PFHpS        | $\text{CF}_3(\text{CF}_2)_6\text{SO}_3\text{H}$                                                       | T        |
| Perfluorooctane sulfonate                       | PFOS         | $\text{CF}_3(\text{CF}_2)_7\text{SO}_3\text{H}$                                                       | T        |
| Perfluorodecane sulfonate                       | PFDS         | $\text{CF}_3(\text{CF}_2)_9\text{SO}_3\text{H}$                                                       | T        |
| N-methylperfluoro octanesulfonamidoacetic acid  | N-MeFOSAA    | $\text{CF}_3(\text{CF}_2)_7\text{SO}_2\text{N}(\text{CH}_3)\text{CH}_2\text{CO}_2\text{H}$            | T        |
| N-ethylperfluorooctane sulfonamidoacetic acid   | N-EtFOSAA    | $\text{CF}_3(\text{CF}_2)_7\text{SO}_2\text{N}(\text{CH}_2\text{CH}_3)\text{CH}_2\text{CO}_2\text{H}$ | T        |
| Hexafluoropropylene oxide-dimer acid            | HFPO-DA      | $\text{CF}_3(\text{CF}_2)_2\text{OCF}(\text{CF}_3)\text{COOH}$                                        | E        |
| Sodium 4,8-dioxa-3H-perfluorononanoate          | ADONA        | $\text{CF}_3\text{O}(\text{CF}_2)_3\text{OCF}(\text{CF}_2)\text{COONa}$                               | E        |
| 6:2 Chlorinated polyfluorinated ether sulfonate | 6:2Cl-PFESA  | $\text{Cl}(\text{CF}_2)_6\text{O}(\text{CF}_2)_2\text{SO}_3^-$                                        | E        |
| 8:2 Chlorinated perfluoroether ether sulfonate  | 8:2Cl-PFESA  | $\text{Cl}(\text{CF}_2)_8\text{O}(\text{CF}_2)_2\text{SO}_3^-$                                        | E        |
| Perfluoro-methoxypropionic acid                 | PFMPA        | $\text{CF}_3\text{O}(\text{CF}_2)_2\text{COOH}$                                                       | E        |

| Compound name                      | Abbreviation | Structures                                                   | Category |
|------------------------------------|--------------|--------------------------------------------------------------|----------|
| Perfluoro-4-methoxybutanoic acid   | PFMBA        | $\text{CF}_3\text{O}(\text{CF}_2)_3\text{COOH}$              | E        |
| Perfluoro-3,6-dioxaheptanoic acid  | NFDHA        | $\text{CF}_3\text{O}(\text{CF}_2)_2\text{OCF}_2\text{COOH}$  | E        |
| Perfluoro-2-ethoxyethane sulfonate | PFEESA       | $\text{CF}_3\text{CF}_2\text{O}(\text{CF}_2)_2\text{SO}_3^-$ | E        |

Compounds were categorized as traditional (T) or emerging (E) using data presented in Xiao <sup>[1]</sup> and Wang et al. <sup>[2]</sup>

**TableS2 Detection limit, quantitation limit and recovery of PFASs in different matrix**

| Compound          | Water (n=6)  |              |               | Soil/Sediment (n=6) |              |               | PM <sub>2.5</sub> (n=6) |              |               |
|-------------------|--------------|--------------|---------------|---------------------|--------------|---------------|-------------------------|--------------|---------------|
|                   | LLOD<br>ng/L | LLOQ<br>ng/L | Recovery<br>% | LLOD<br>ng/L        | LLOQ<br>ng/L | Recovery<br>% | LLOD<br>ng/L            | LLOQ<br>ng/L | Recovery<br>% |
| PFBA              | 0.2          | 0.8          | 95.4±23.4     | 0.03                | 0.12         | 112.5±29.6    | 2.2                     | 8.8          | 95.0±21.4     |
| PFPeA             | 0.2          | 0.8          | 114.5±19.2    | 0.03                | 0.12         | 89.7±5.4      | 2.2                     | 8.8          | 112.7±18      |
| PFHxA             | 0.02         | 0.08         | 102.7±15.6    | 0.003               | 0.01         | 127.2±10.6    | 0.2                     | 0.8          | 108.7±18      |
| PFHpA             | 0.02         | 0.08         | 94.3±24.0     | 0.003               | 0.01         | 85.7±16.6     | 0.2                     | 0.8          | 78.2±20.4     |
| PFOA              | 0.02         | 0.08         | 131.5±35.2    | 0.003               | 0.01         | 97.9±28.6     | 0.2                     | 0.8          | 130.3±34      |
| PFNA              | 0.02         | 0.08         | 108.8±29.6    | 0.003               | 0.01         | 96±27.8       | 0.2                     | 0.8          | 111.8±26.4    |
| PFDA              | 0.04         | 0.2          | 84.9±20.2     | 0.004               | 0.02         | 98.4±4.6      | 0.3                     | 1.2          | 81.0±30.0     |
| PFUnA             | 0.03         | 0.2          | 102.7±22.4    | 0.004               | 0.02         | 75.4±18.8     | 0.3                     | 1.2          | 94.4±30.0     |
| PFDoA             | 0.03         | 0.2          | 91.7±18.6     | 0.004               | 0.02         | 72.4±29.6     | 0.3                     | 1.2          | 105.8±0.6     |
| PFTTrA            | 0.03         | 0.2          | 102.6±38.2    | 0.004               | 0.02         | 104.9±1.0     | 0.3                     | 1.2          | 81.6±28.2     |
| PFTeA             | 0.03         | 0.2          | 80.3±34.2     | 0.004               | 0.02         | 108.2±25.2    | 0.3                     | 1.2          | 111.0±1.0     |
| PFBS              | 0.09         | 0.4          | 88.3±11.0     | 0.01                | 0.04         | 119.2±15.8    | 0.9                     | 3.6          | 116.2±18.8    |
| PFHxS             | 0.02         | 0.08         | 107.4±5.6     | 0.003               | 0.01         | 126.5±2.4     | 0.2                     | 0.8          | 67.9±29.8     |
| PFHpS             | 0.01         | 0.04         | 97.8±4.2      | 0.001               | 0.004        | 98.5±37.6     | 0.09                    | 0.4          | 71.3±20.2     |
| PFOS              | 0.01         | 0.04         | 108.6±11.6    | 0.001               | 0.004        | 99.9±26.4     | 0.09                    | 0.4          | 106.5±7.8     |
| PFDS              | 0.01         | 0.04         | 62.7±10.2     | 0.001               | 0.004        | 60.0±18.8     | 0.09                    | 0.4          | 126.1±2.6     |
| <i>N</i> -MeFOSAA | 0.02         | 0.08         | 98±13.8       | 0.003               | 0.01         | 98.5±17.0     | 0.2                     | 0.8          | 103.6±14.8    |
| <i>N</i> -EtFOSAA | 0.02         | 0.08         | 95.7±6.8      | 0.003               | 0.01         | 81.5±35.6     | 0.2                     | 0.8          | 62.0±6.8      |
| HFPO-DA           | 0.2          | 0.8          | 85±22.8       | 0.03                | 0.12         | 98.6±29.6     | 2.2                     | 8.8          | 74.0±20.0     |
| ADONA             | 0.005        | 0.02         | 120.6±10.0    | 0.001               | 0.004        | 121.2±18.2    | 0.04                    | 0.2          | 116.5±8.8     |
| 6:2Cl-PFESA       | 0.004        | 0.02         | 75±37.2       | 0.001               | 0.004        | 63.7±20.2     | 0.04                    | 0.2          | 104.7±3.8     |
| 8:2Cl-PFESA       | 0.005        | 0.02         | 110.3±19.4    | 0.001               | 0.004        | 112.0±14.4    | 0.04                    | 0.2          | 82.6±34.0     |

| Compound | Water (n=6)  |              |               | Soil/Sediment (n=6) |              |               | PM <sub>2.5</sub> (n=6) |              |               |
|----------|--------------|--------------|---------------|---------------------|--------------|---------------|-------------------------|--------------|---------------|
|          | LLOD<br>ng/L | LLOQ<br>ng/L | Recovery<br>% | LLOD<br>ng/L        | LLOQ<br>ng/L | Recovery<br>% | LLOD<br>ng/L            | LLOQ<br>ng/L | Recovery<br>% |
| PFMPA    | 0.01         | 0.04         | 86.3±10.4     | 0.001               | 0.004        | 85.7±18.0     | 0.09                    | 0.4          | 67.6±33.4     |
| PFMBA    | 0.01         | 0.04         | 113.3±22.8    | 0.001               | 0.004        | 101.1±15.6    | 0.09                    | 0.4          | 64.8±37.4     |
| NFDHA    | 0.2          | 0.8          | 106.7±17.6    | 0.02                | 0.08         | 95.7±22.4     | 1.3                     | 5.2          | 66.9±39.2     |
| PFEESA   | 0.004        | 0.02         | 105.5±17.4    | 0.001               | 0.004        | 73.6±24.2     | 0.04                    | 0.2          | 104.8±0.6     |

LLOD means detection limit; LLOQ means quantitation limit.

Table S3 Concentrations of 26 PFASs in the environment of Qiantang River watershed

| Compound    | Water (ng/L) |            |       | PM <sub>2.5</sub> (pg/m <sup>3</sup> ) |            |       | Soil (ng/g) |            |       | Sediment (ng/g) |            |       |
|-------------|--------------|------------|-------|----------------------------------------|------------|-------|-------------|------------|-------|-----------------|------------|-------|
|             | Mean         | Range      | DF(%) | Mean                                   | Range      | DF(%) | Mean        | Range      | DF(%) | Mean            | Range      | DF(%) |
| PFBA        | 0.28         | <LLOD~1.02 | 9.4   | 1.14                                   | <LLOD~4.07 | 29    | <LLOD       | <LLOD      | /     | <LLOD           | <LLOD      | /     |
| PFPeA       | 1.66         | <LLOD~16.5 | 97    | 53.7                                   | 17.0~110.7 | 100   | <LLOD       | <LLOD      | /     | <LLOD           | <LLOD      | /     |
| PFHxA       | 14.7         | 0.3~170    | 100   | 3.09                                   | 0.56~9.13  | 100   | 0.07        | <LLOD~0.94 | 7.1   | 0.17            | <LLOD~0.87 | 7.1   |
| PFHpA       | 2.74         | <LLOD~21.4 | 97    | 4.35                                   | <LLOD~10.2 | 71    | <LLOD       | <LLOD      | /     | <LLOD           | <LLOD      | /     |
| PFOA        | 96.7         | 3.01~525   | 100   | 50.4                                   | 9.01~216   | 100   | 1.05        | 0.71~2.8   | 100   | 1.18            | 0.72~3.00  | 100   |
| PFNA        | 1.20         | <LLOD~9.27 | 100   | 2.03                                   | <LLOD~7.10 | 57    | 0.21        | <LLOD~0.97 | 21    | 0.20            | <LLOD~0.99 | 21    |
| PFDA        | 2.21         | <LLOD~4.98 | 94    | 1.59                                   | <LLOD~7.66 | 71    | 0.61        | <LLOD~1.22 | 50    | 0.26            | <LLOD~1.29 | 50    |
| PFUnA       | 0.23         | <LLOD~3.16 | 59    | 2.30                                   | <LLOD~10.3 | 71    | 0.38        | <LLOD~1.33 | 29    | 0.53            | <LLOD~1.35 | 29    |
| PFDoA       | 0.46         | <LLOD~1.46 | 41    | 3.91                                   | <LLOD~13.7 | 29    | <LLOD       | <LLOD      | 7.1   | <LLOD           | <LLOD      | /     |
| PFTtA       | 0.06         | <LLOD~0.84 | 19    | 5.85                                   | <LLOD~19.9 | 86    | <LLOD       | <LLOD      | /     | <LLOD           | <LLOD      | /     |
| PFTeA       | 0.04         | <LLOD~0.51 | 16    | 6.26                                   | <LLOD~19.7 | 71    | 0.12        | <LLOD~1.68 | /     | <LLOD           | <LLOD      | 7.1   |
| PFBS        | 0.61         | 0.13~2.53  | 100   | 14.6                                   | <LLOD~43.2 | 57    | <LLOD       | <LLOD      | /     | <LLOD           | <LLOD      | /     |
| PFHxS       | 7.27         | <LLOD~65.8 | 88    | 0.06                                   | <LLOD~0.40 | 14    | 0.06        | <LLOD~0.83 | 7.1   | 0.37            | <LLOD~1.01 | 7.1   |
| PFHpS       | 0.02         | <LLOD~0.22 | 9.4   | <LLOD                                  | <LLOD      | <LLOD | <LLOD       | <LLOD      | /     | <LLOD           | <LLOD      | /     |
| PFOS        | 2.31         | <LLOD~12.3 | 97    | 6.30                                   | 2.90~17.0  | 100   | 0.57        | <LLOD~1.05 | 57    | 0.60            | <LLOD~1.02 | 57    |
| PFDS        | 0.02         | <LLOD~0.1  | 3.1   | <LLOD                                  | <LLOD      | <LLOD | <LLOD       | <LLOD      | /     | <LLOD           | <LLOD      | /     |
| N-MeFOSAA   | 0.21         | <LLOD~0.11 | 3.1   | 36.0                                   | 33.0~39.0  | 14    | 0.24        | <LLOD~1.96 | 14    | <LLOD           | <LLOD      | 14    |
| N-EtFOSAA   | <LLOD        | <LLOD      | /     | <LLOD                                  | <LLOD      | 14    | 0.59        | <LLOD~3.15 | 21    | <LLOD           | <LLOD      | 21    |
| HFPO-DA     | 3.54         | <LLOD~47.1 | 72    | 0.04                                   | <LLOD~0.29 | <LLOD | <LLOD       | <LLOD      | /     | <LLOD           | <LLOD      | /     |
| ADONA       | 0.09         | <LLOD~1.27 | 28    | 0.07                                   | <LLOD~0.48 | 43    | <LLOD       | <LLOD      | /     | <LLOD           | <LLOD      | /     |
| 6:2Cl-PFESA | 34.1         | <LLOD~4.61 | 91    | <LLOD                                  | <LLOD      | 57    | 0.57        | <LLOD~1.16 | 50    | 0.68            | <LLOD~1.14 | 50    |
| 8:2Cl-PFESA | 2.16         | <LLOD~0.34 | 16    | 0.04                                   | <LLOD~0.24 | <LLOD | 0.23        | <LLOD~1.63 | 14    | 0.33            | <LLOD~1.63 | 14    |

| Compound          | Water (ng/L) |            |       | PM <sub>2.5</sub> (pg/m <sup>3</sup> ) |            |       | Soil (ng/g) |            |       | Sediment (ng/g) |            |       |
|-------------------|--------------|------------|-------|----------------------------------------|------------|-------|-------------|------------|-------|-----------------|------------|-------|
|                   | Mean         | Range      | DF(%) | Mean                                   | Range      | DF(%) | Mean        | Range      | DF(%) | Mean            | Range      | DF(%) |
| NFDHA             | 1.13         | <LLOD~5.07 | 78    | 0.59                                   | <LLOD~2.73 | <LLOD | <LLOD       | <LLOD      | /     | <LLOD           | <LLOD      | /     |
| PFEESA            | 0.03         | <LLOD~0.49 | 9.4   | <LLOD                                  | <LLOD      | <LLOD | <LLOD       | <LLOD      | /     | <LLOD           | <LLOD      | /     |
| PFMBA             | 0.03         | <LLOD~0.46 | 13    | <LLOD                                  | <LLOD      | <LLOD | <LLOD       | <LLOD      | /     | <LLOD           | <LLOD      | /     |
| Emerging PFASs    | 143          | 3.58~735   | 88    | 156                                    | 93.6~255   | 100   | 3.90        | <LLOD      | 56    | 3.31            | 0.73~8.48  | 56    |
| Traditional PFASs | 6.08         | <LLOD~51.4 | 100   | 0.63                                   | <LLOD~2.77 | 25    | 0.81        | 0.72~11.1  | 25    | 1.00            | <LLOD~2.76 | 25    |
| ΣPFASs            | 149          | 3.58~786   | 100   | 156                                    | 93.9~255.2 | 77    | 4.70        | <LLOD~2.79 | 46    | 4.31            | 0.73~8.48  | 46    |

LLOD means detection limit; DF means detection frequencies.

**Table S4 The lgK<sub>d</sub> of PFASs between water and sediment / (ng/kg)**

| Compound    | lgK <sub>d</sub> |
|-------------|------------------|
| PFHxA       | 0.71             |
| PFOA        | 1.16             |
| PFNA        | 2.46             |
| PFDA        | 2.85             |
| PFUnA       | 4.02             |
| PFHxS       | 2.36             |
| PFOS        | 2.81             |
| 6:2Cl-PFESA | 3.04             |
| 8:2Cl-PFESA | 4.00             |

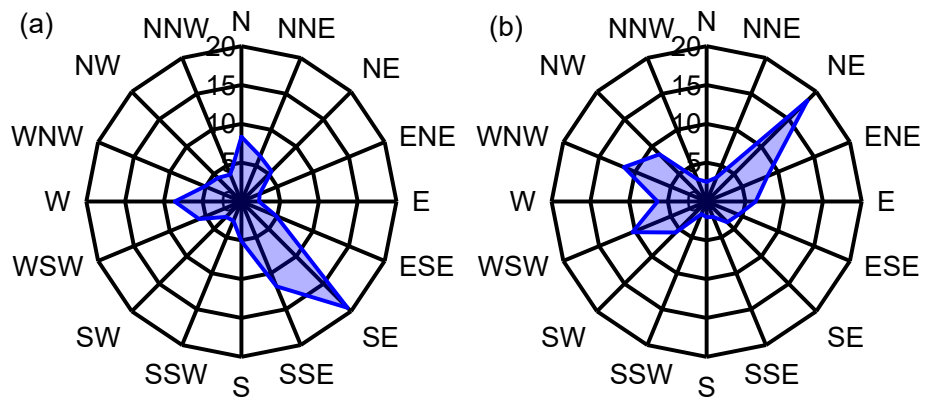

Fig. S1 The windrose diagram of (a) site 39 and (b) site 38

### Reference

- [1] F. Xiao, *Water Res.* 2017, 124, 482-495.
- [2] Z. Y. Wang, I. T. Cousins, M. Scheringer, K. Hungerbuhler. *Environ Int.* 2013,60, 242-248.
